# Supplementary material for: Enabling both ultrahigh initial coulombic efficiency and superior stability of Na2Ti3O7anodes by optimizing binders
Source: Royal Society of Chemistry journal article supplement (doi:10.1039/d2ta07097a), 2022-01-01
Supplement: d2ta07097a1.pdf [file d2ta07097a1.pdf]

## Electronic Supplementary Information

# Enabling both ultrahigh initial Coulombic efficiency and superior stability of $\text{Na}_2\text{Ti}_3\text{O}_7$ anode via optimizing binders

Ying Li,<sup>a</sup> Yihua Liu,<sup>a</sup> Dong Wang,<sup>a</sup> Changyan Hu,<sup>a</sup> Kangying Luo,<sup>a</sup> Benhe Zhong,<sup>a</sup> Yan Sun,<sup>b</sup> Yang Liu,<sup>c</sup> Zhenguo Wu<sup>\*a</sup> and Xiaodong Guo<sup>\*a</sup>

<sup>a</sup>School of Chemical Engineering, Sichuan University, Chengdu 610065, China

<sup>b</sup>School of Mechanical Engineering, Chengdu University, Chengdu 610106, China

<sup>c</sup>School of Materials Science and Engineering, Henan Normal University, XinXiang 453007, China

Address correspondence to

Zhenguo Wu, zhenguowu@scu.edu.cn;

Xiaodong Guo, xiaodong2009@scu.edu.cn

## Experimental details

### Materials synthesis

$\text{Na}_2\text{Ti}_3\text{O}_7$  (NTO) microrods were prepared by high-temperature solid-state method. 1.02g of  $\text{Na}_2\text{CO}_3$  (99%, KESHI) and 2.20g of  $\text{TiO}_2$  (99%, KESHI), corresponding to a slight excess of  $\text{Na}_2\text{CO}_3$  with regard to the molar stoichiometry, together with about 3mL ethanol (AR, KESHI) were hand-milled for 30 mins. Then, the well-mixed powder was calcined in air at 900 °C for 15 h with heating and cooling rate of 5 °C min<sup>-1</sup>. All the original materials were purchased and used without further purification.

The active materials (70 wt%) and SuperP conductive agent (20 wt%) were homogeneously mixed with binder (10 wt%) in corresponding solvent (PVDF corresponding to N-methyl pyrrolidone (NMP); CMC and CMC&SBR corresponding to water) for 0.5 h to form a viscous slurry, which was then casted onto a copper (Cu) foil. After vacuum-drying at 80 °C for 12 h accompanying with the solvent deeply volatilizing, the electrodes were punched into circular pieces with a diameter of 14 mm and mass loading of  $3.2 \pm 0.3$  mg.

### Materials characterization

XRD (Bruker D8 Advance, Cu K $\alpha$  radiation) was carried out to obtain the crystal structure. Scanning electron microscopy (SEM, FEI Inspect F50) and transmission electron microscopy (TEM, JEOLJEM 2100F) images were obtained to identify morphology and microstructure. Raman spectra were collected by using a solid-state 532 nm excitation laser. X-ray photoelectron spectroscopy (XPS, Thermo Scientific K-Alpha+, Mono Al K $\alpha$  radiation) was used to analyze the SEI film components.

### Microscratch test

The bond strength between the electrode-membrane and the copper foil and the cohesive strength between the  $\text{Na}_2\text{Ti}_3\text{O}_7$  microrods with conductive carbon particles and the binder were measured by scratching the film surface with a tip of durometer indenter (Rockwell type). A tapered diamond stylus (Berkovich) with a tip radius of 100  $\mu\text{m}$  and a taper angle of 142.3° was used. The scratch tip was placed over the film surface and a 2-mm-long scratch trajectory was made by parallel transporting the sample while linearly increasing the normal load of the tapered tip from 0.01 N to 5 N. Accompanying by normal load rate of 9.98 N min<sup>-1</sup>, the speed of sample translation was 4 mm s<sup>-1</sup>. During scratching processes, the tangential force  $F_t$  and the normal force  $F_n$  were detected on-site in real time.

### Electrochemical test

Using these electrode pieces, electrolyte (1.0 M NaPF<sub>6</sub> dissolved in glyme i.e., DME), pure sodium foils as counter electrodes and Whatman GF/D glass fibers as separators, 2025-type coin cells were assembled in an argon-filled glove box with both oxygen and moisture contents less than 0.1 ppm. Galvanostatic charge/discharge measurements at different current densities were carried out on a battery controlling system (Neware BTS-610) in a voltage range from 2.5 to 0.01 V (versus Na/Na<sup>+</sup>). Cyclic voltammetry (CV) tests were performed on an electrochemical workstation (LK 9805) with a voltage window of 0.01–2.5 V at various scan rates. Electrochemical impedance spectroscopy (EIS) measurements were carried out by Zennium IM6 electrochemical workstation. The galvanostatic intermittent titration technique (GITT) tests were performed on a CT2001A LANHE electrochemical workstation by applying a constant current flux (17.7 mA g<sup>-1</sup>) for 10 minutes, followed by open-circuit equilibration time for 1.0 h. Diffusion coefficient values are calculated from GITT curves. All the electrochemical measurements above were conducted at 25 °C.

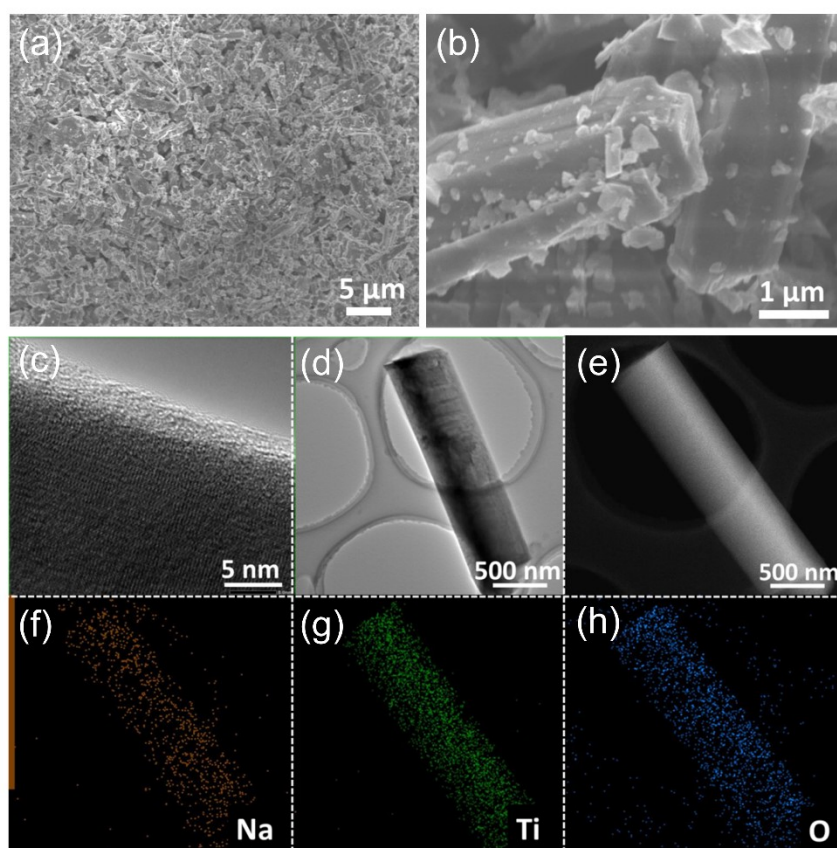

**Figure S1** Basic information for the pristine Na<sub>2</sub>Ti<sub>3</sub>O<sub>7</sub> sample. (a) Low magnification and (b) high magnification SEM images, (c-e) TEM and HRTEM images, (f-h) corresponding EDX mapping images.

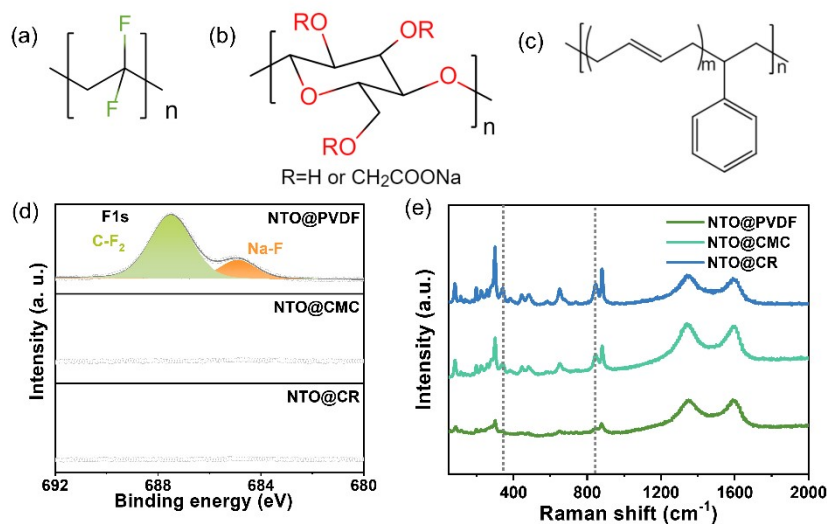

**Figure S2** Molecular structural formula of (a) PVDF, (b) CMC and (c) SBR; (d)  $F1s$  spectra of pristine electrodes; (e) Raman spectra of NTO composite electrodes after one cycle.

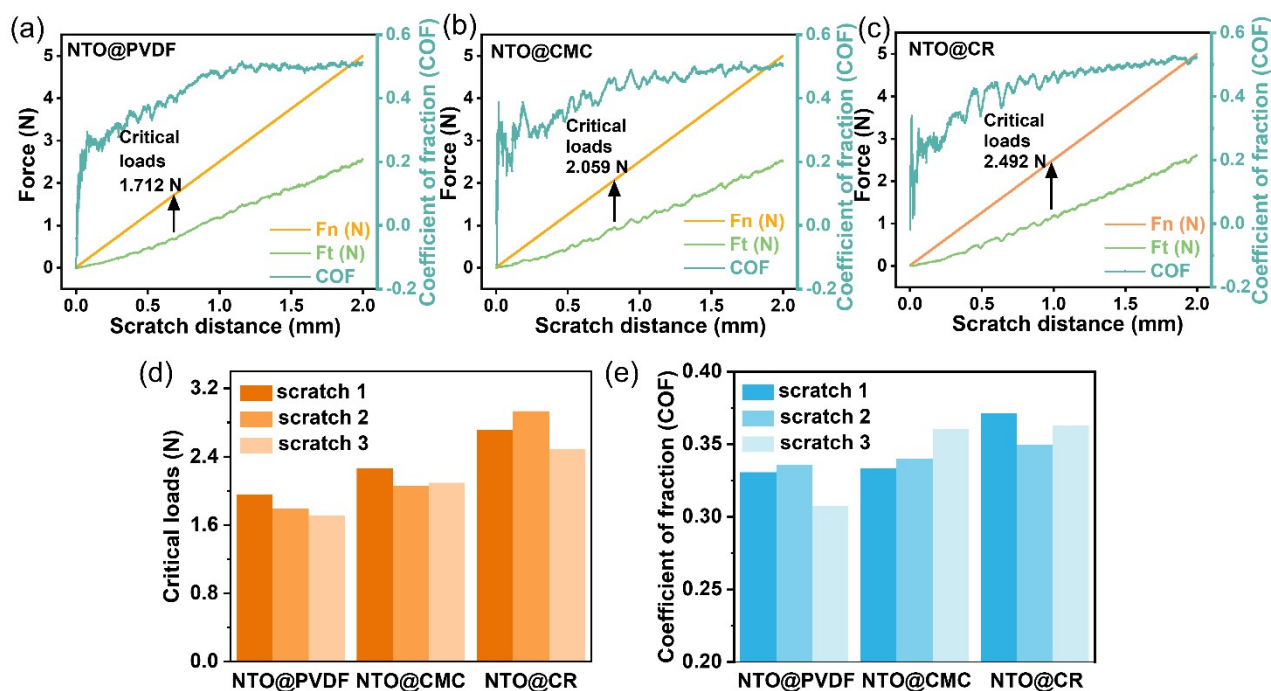

**Figure S3** Microscratch test results. Values ( $F_n$ ,  $F_t$ , and  $COF$ ) as a function of scratch distance for one of the (a) NTO@PVDF, (b) NTO@CMC and (c) NTO@CR electrodes. (d) Critical loads detected and (e)  $COF$ s calculated for each test.

Initially, as the tip started to slide and press on the film surface, the  $COF$  of all electrodes increased promptly with increasing normal load; and then with the normal load progressively gaining, the  $COF$  reached steady state and fluctuated slightly; after exceeding the critical delamination load, the  $COF$  suddenly increased due to the accumulation of obvious delamination debris at the scratch tip.

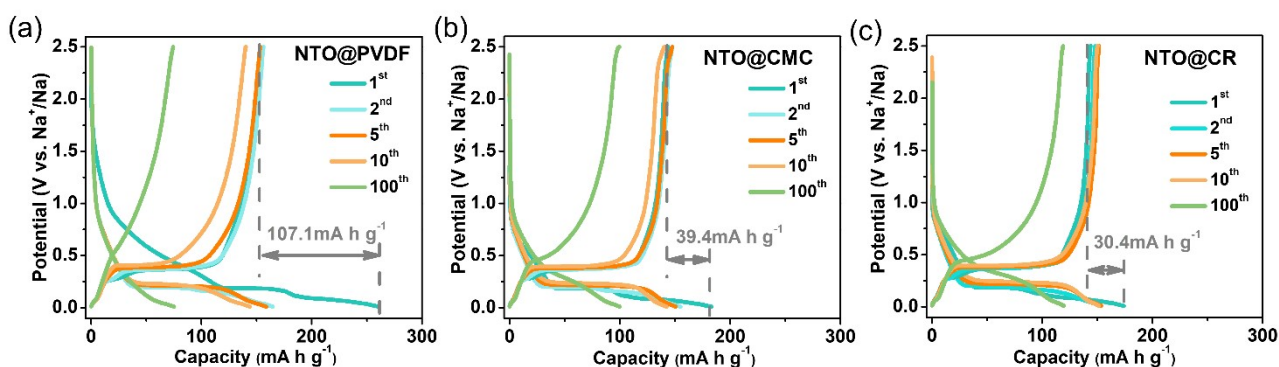

**Figure S4** Charge-discharge plots cycled at 0.5 C of (a) NTO@PVDF, (b) NTO@CMC and (c) NTO@CR electrode.

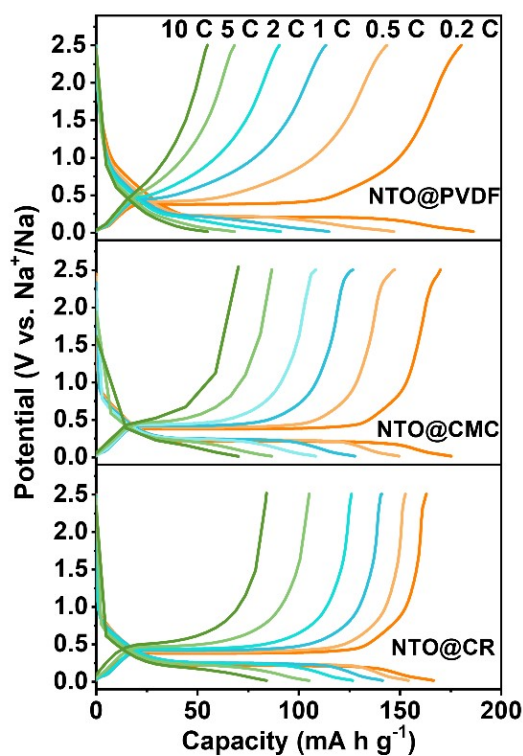

**Figure S5** Comparison of charge-discharge plots cycled at different current values.

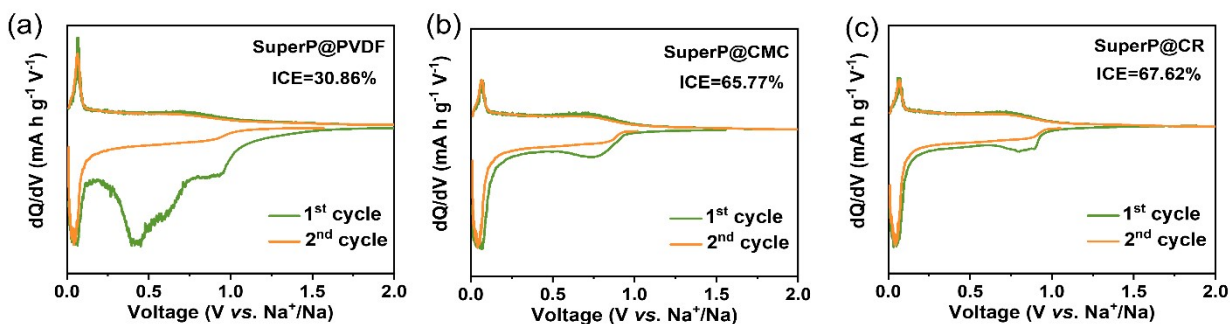

**Figure S6** The  $dQ/dV$  plots for the first two cycles of (a) SuperP@PVDF, (b) SuperP@CMC, and (c) SuperP@CR.

**Table S1** Voltage segmented capacity table

| Number of cycles | Electrode | The discharge capacity of corresponding voltage range ( mA h g <sup>-1</sup> ) |               |             |               |
|------------------|-----------|--------------------------------------------------------------------------------|---------------|-------------|---------------|
|                  |           | 0.01-0.136 V                                                                   | 0.136-0.227 V | 0.227-2.0 V | 0.01-2.0 V    |
| Cycle one        | NTO@PVDF  | 80.24                                                                          | 68.55         | 111.71      | <b>260.5</b>  |
|                  | NTO@CMC   | 84.37                                                                          | 61.41         | 37.01       | <b>182.79</b> |
|                  | NTO@CR    | 80.27                                                                          | 58.83         | 34.91       | <b>174.01</b> |
|                  |           | The discharge capacity of corresponding voltage range ( mA h g <sup>-1</sup> ) |               |             |               |
|                  |           | 0.01-0.085 V                                                                   | 0.085-0.227 V | 0.227-2.0 V | 0.01-2.0 V    |
| Cycle two        | NTO@PVDF  | 23.98                                                                          | 105.98        | 34.02       | <b>164.52</b> |
|                  | NTO@CMC   | 20.46                                                                          | 108.16        | 26.12       | <b>154.86</b> |
|                  | NTO@CR    | 20.54                                                                          | 105.75        | 26.93       | <b>153.31</b> |

**Table S2** The discharge capacity difference values for two areas

| Electrode | The discharge capacity difference value ( mA h g <sup>-1</sup> ) |          |
|-----------|------------------------------------------------------------------|----------|
|           | Area one                                                         | Area two |
| NTO@PVDF  | 18.83                                                            | 77.69    |
| NTO@CMC   | 17.16                                                            | 10.89    |
| NTO@CR    | 12.81                                                            | 7.98     |

**Table S3** XPS spectral features for electrodes after one cycle

| Electrode | Element | Binding Energy (eV) | Peak Assignment                 | Species                                            |
|-----------|---------|---------------------|---------------------------------|----------------------------------------------------|
| NTO@PVDF  | C1s     | 284.84              | C-C                             | SuperP                                             |
|           |         | 286.27              | C-O                             | R-O-Na                                             |
|           |         | 290.00              | C-O <sub>3</sub>                | Na <sub>2</sub> CO <sub>3</sub>                    |
|           | Na1s    | 1071.5              | Na-F, Na-O                      | NaF, R-O-Na, Na <sub>2</sub> CO <sub>3</sub>       |
|           |         | 1073.22             | Na <sub>x</sub> PF <sub>y</sub> | Na <sub>x</sub> PF <sub>y</sub>                    |
|           | F1s     | 684.63              | Na-F                            | NaF                                                |
|           |         | 687.10              | Na <sub>x</sub> PF <sub>y</sub> | Na <sub>x</sub> PF <sub>y</sub>                    |
| NTO@CMC   | C1s     | 284.86              | C-C                             | SuperP                                             |
|           |         | 286.16              | C-O                             | R-O-Na, CMC                                        |
|           |         | 289.01              | C-O <sub>2</sub>                | CMC                                                |
|           |         | 289.95              | C-O <sub>3</sub>                | Na <sub>2</sub> CO <sub>3</sub>                    |
|           | Na1s    | 1071.27             | Na-F, Na-O                      | NaF, R-O-Na, Na <sub>2</sub> CO <sub>3</sub> , CMC |
|           | F1s     | 683.90              | Na-F                            | NaF                                                |
|           |         | 687.39              | Na <sub>x</sub> PF <sub>y</sub> | Na <sub>x</sub> PF <sub>y</sub>                    |
| NTO@CR    | C1s     | 284.90              | C-C                             | SuperP                                             |
|           |         | 286.24              | C-O                             | R-O-Na, CMC                                        |
|           |         | 289.23              | C-O <sub>2</sub>                | CMC                                                |
|           |         | 290.06              | C-O <sub>3</sub>                | Na <sub>2</sub> CO <sub>3</sub>                    |
|           | Na1s    | 1071.50             | Na-F, Na-O                      | NaF, R-O-Na, Na <sub>2</sub> CO <sub>3</sub> , CMC |
|           | F1s     | 683.68              | Na-F                            | NaF                                                |
|           |         | 687.64              | Na <sub>x</sub> PF <sub>y</sub> | Na <sub>x</sub> PF <sub>y</sub>                    |



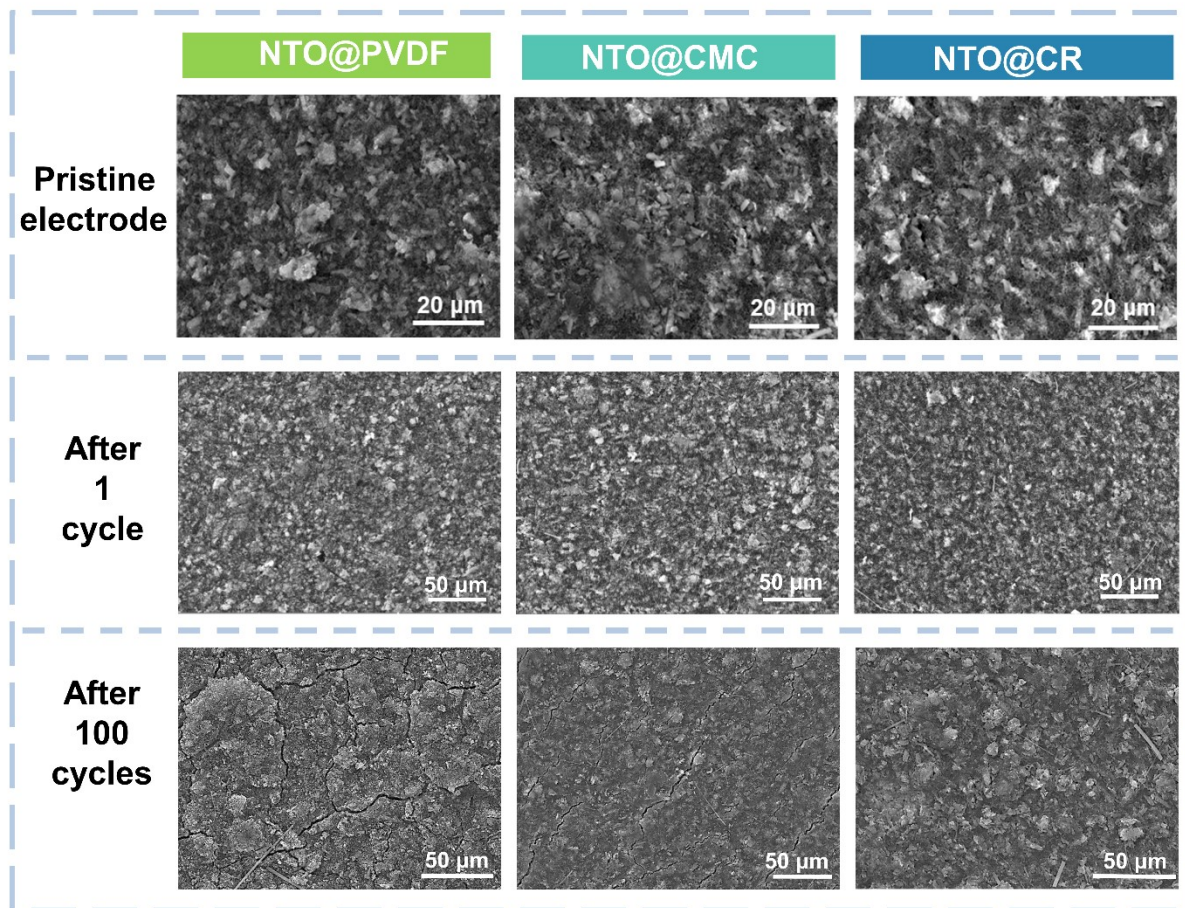

**Figure S7** SEM images of (a-c) pristine electrodes, (d-f) electrodes after 1 cycle and (g-i) after 100 cycles.

**Table S4** XPS spectral features for NTO@PVDF electrode after 100 cycles

| Element | Depth  | Binding Energy (eV) | Peak Assignment                 | Peak Area (CPS.eV) | Species                                        |
|---------|--------|---------------------|---------------------------------|--------------------|------------------------------------------------|
| F1s     | 0 nm   | 685.70              | Na-F                            | 7070.901           | NaF                                            |
|         |        | 687.93              | Na <sub>x</sub> PF <sub>y</sub> | 79680.18           | Na <sub>x</sub> PF <sub>y</sub>                |
|         | 17 nm  | 685.91              | Na-F                            | 29355.26           | NaF                                            |
|         |        | 687.70              | Na <sub>x</sub> PF <sub>y</sub> | 73674.58           | Na <sub>x</sub> PF <sub>y</sub>                |
|         | 117 nm | 685.87              | Na-F                            | 85699.82           | NaF                                            |
|         |        | 687.4               | Na <sub>x</sub> PF <sub>y</sub> | 35642.8            | Na <sub>x</sub> PF <sub>y</sub>                |
| Na1s    | 0 nm   | 1073.38             | Na-F, Na-O                      | 244155.2           | NaF, R-O-Na<br>Na <sub>2</sub> CO <sub>3</sub> |
|         |        | 1074.69             | Na <sub>x</sub> PF <sub>y</sub> | 111722.1           | Na <sub>x</sub> PF <sub>y</sub>                |
|         | 17 nm  | 1073.44             | Na-F, Na-O                      | 344880.8           | NaF, R-O-Na<br>Na <sub>2</sub> CO <sub>3</sub> |
|         |        | 1074.53             | Na <sub>x</sub> PF <sub>y</sub> | 219262             | Na <sub>x</sub> PF <sub>y</sub>                |
|         | 117 nm | 1073.01             | Na-F, Na-O                      | 451643             | NaF, R-O-Na<br>Na <sub>2</sub> CO <sub>3</sub> |
|         |        | 1074.19             | Na <sub>x</sub> PF <sub>y</sub> | 101184.7           | Na <sub>x</sub> PF <sub>y</sub>                |

| Element | Depth  | Binding Energy (eV) | Peak Assignment  | Peak Area (CPS.eV) | Species                         |
|---------|--------|---------------------|------------------|--------------------|---------------------------------|
| C1s     | 0 nm   | 284.83              | C-C              | 54693.66           | SuperP                          |
|         |        | 286.37              | C-O              | 52461.48           | R-O-Na                          |
|         |        | 290.42              | C-O <sub>3</sub> | 14221.4            | Na <sub>2</sub> CO <sub>3</sub> |
|         |        | 291.7               | C-F <sub>2</sub> | 16682.66           | PVDF                            |
|         | 17 nm  | 284.98              | C-C              | 49917.45           | SuperP                          |
|         |        | 286.36              | C-O              | 33503.4            | R-O-Na                          |
|         |        | 290.69              | C-O <sub>3</sub> | 7284.991           | Na <sub>2</sub> CO <sub>3</sub> |
|         |        | 291.69              | C-F <sub>2</sub> | 18228.49           | PVDF                            |
|         | 117 nm | 284.91              | C-C              | 53090.7            | SuperP                          |
|         |        | 286.2               | C-O              | 35110.77           | R-O-Na                          |
|         |        | 290.6               | C-O <sub>3</sub> | 5082.72            | Na <sub>2</sub> CO <sub>3</sub> |
|         |        | 291.51              | C-F <sub>2</sub> | 9998.086           | PVDF                            |

**Table S5** XPS spectral features for NTO@CMC electrode after 100 cycles

| Element | Depth  | Binding Energy (eV) | Peak Assignment  | Peak Area (CPS.eV) | Species                                              |
|---------|--------|---------------------|------------------|--------------------|------------------------------------------------------|
| F1s     | 0 nm   | 685.32              | Na-F             | 8686.476           | NaF                                                  |
|         |        | 688.32              | P-F              | 6037.77            | Na <sub>x</sub> PF <sub>y</sub>                      |
|         | 17 nm  | 685.38              | Na-F             | 12503.31           | NaF                                                  |
|         |        | 688.12              | P-F              | 4478.88            | Na <sub>x</sub> PF <sub>y</sub>                      |
|         | 117 nm | 685.35              | Na-F             | 19308.55           | NaF                                                  |
|         |        | 687.99              | P-F              | 2744.663           | Na <sub>x</sub> PF <sub>y</sub>                      |
| Na1s    | 0 nm   | 1073.05             | Na-F, Na-O       | 300974.8           | NaF, R-O-Na<br>Na <sub>2</sub> CO <sub>3</sub> , CMC |
|         | 17 nm  | 1073.07             | Na-F, Na-O       | 361738.5           | NaF, R-O-Na<br>Na <sub>2</sub> CO <sub>3</sub> , CMC |
|         | 117 nm | 1072.95             | Na-F, Na-O       | 316988.7           | NaF, R-O-Na<br>Na <sub>2</sub> CO <sub>3</sub> , CMC |
| C1s     | 0 nm   | 284.70              | C-C              | 67748.59           | SuperP                                               |
|         |        | 285.83              | C-O              | 29446.84           | R-O-Na, CMC                                          |
|         |        | 287.29              | C-O <sub>2</sub> | 32674.44           | CMC                                                  |
|         |        | 290.57              | C-O <sub>3</sub> | 22188.33           | Na <sub>2</sub> CO <sub>3</sub>                      |
|         | 17 nm  | 284.66              | C-C              | 62764.25           | SuperP                                               |
|         |        | 285.78              | C-O              | 33108.65           | R-O-Na, CMC                                          |
|         |        | 287.22              | C-O <sub>2</sub> | 27659.34           | CMC                                                  |
|         |        | 290.77              | C-O <sub>3</sub> | 19154.61           | Na <sub>2</sub> CO <sub>3</sub>                      |
|         | 117 nm | 284.67              | C-C              | 65819.7            | SuperP                                               |
|         |        | 285.72              | C-O              | 39052.81           | R-O-Na, CMC                                          |
|         |        | 287.29              | C-O <sub>2</sub> | 28672.27           | CMC                                                  |
|         |        | 290.75              | C-O <sub>3</sub> | 16619.2            | Na <sub>2</sub> CO <sub>3</sub>                      |

**Table S6** XPS spectral features for NTO@CR electrode after 100 cycles

| Element | Depth  | Binding Energy (eV) | Peak Assignment  | Peak Area (CPS.eV) | Species                                              |
|---------|--------|---------------------|------------------|--------------------|------------------------------------------------------|
| F1s     | 0 nm   | 684.94              | Na-F             | 2738.095           | NaF                                                  |
|         |        | 688.16              | P-F              | 12066.78           | Na <sub>x</sub> PF <sub>y</sub>                      |
|         | 17 nm  | 685.21              | Na-F             | 9322.888           | NaF                                                  |
|         |        | 688.26              | P-F              | 5708.628           | Na <sub>x</sub> PF <sub>y</sub>                      |
|         | 117 nm | 685.32              | Na-F             | 37757.95           | NaF                                                  |
|         |        | 687.94              | P-F              | 13338.45           | Na <sub>x</sub> PF <sub>y</sub>                      |
| Na1s    | 0 nm   | 1072.80             | Na-F, Na-O       | 137106.7           | NaF, R-O-Na<br>Na <sub>2</sub> CO <sub>3</sub> , CMC |
|         | 17 nm  | 1072.89             | Na-F, Na-O       | 191000.5           | NaF, R-O-Na<br>Na <sub>2</sub> CO <sub>3</sub> , CMC |
|         | 117 nm | 1072.81             | Na-F, Na-O       | 187401.7           | NaF, R-O-Na<br>Na <sub>2</sub> CO <sub>3</sub> , CMC |
| C1s     | 0 nm   | 284.80              | C-C              | 126439.1           | SuperP                                               |
|         |        | 285.70              | C-O              | 67444.31           | R-O-Na, CMC                                          |
|         |        | 287.13              | C-O <sub>2</sub> | 22727.78           | CMC                                                  |
|         |        | 289.90              | C-O <sub>3</sub> | 14745.21           | Na <sub>2</sub> CO <sub>3</sub>                      |
|         | 17 nm  | 284.78              | C-C              | 117330.9           | SuperP                                               |
|         |        | 285.78              | C-O              | 63479.4            | R-O-Na, CMC                                          |
|         |        | 287.15              | C-O <sub>2</sub> | 26698.17           | CMC                                                  |
|         |        | 290.51              | C-O <sub>3</sub> | 12521.9            | Na <sub>2</sub> CO <sub>3</sub>                      |
|         | 117 nm | 284.69              | C-C              | 121970.8           | SuperP                                               |
|         |        | 285.63              | C-O              | 59941.81           | R-O-Na, CMC                                          |
|         |        | 286.84              | C-O <sub>2</sub> | 20947.02           | CMC                                                  |
|         |        | 289.62              | C-O <sub>3</sub> | 31757.97           | Na <sub>2</sub> CO <sub>3</sub>                      |

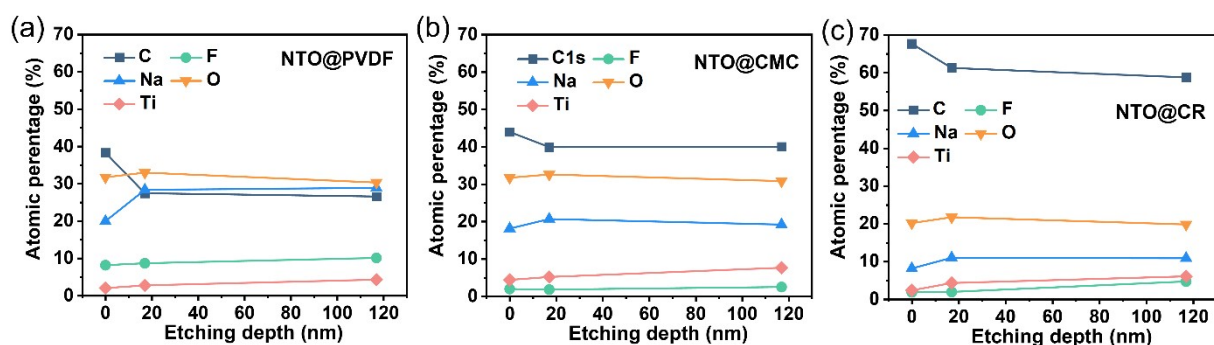**Figure S8** Relative content of each element Changes within etching depth for (a) NTO@PVDF, (b) NTO@CMC and (c) NTO@CR electrode after 100 cycles.



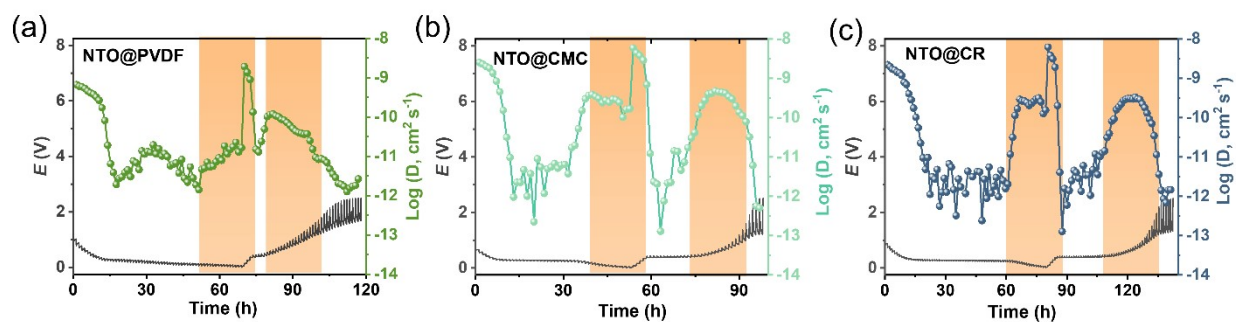

**Figure S9** Galvanostatic intermittent titration technique (GITT) potential profiles and  $\text{Na}^+$  apparent diffusion coefficients calculated from the GITT potential profiles of (a) NTO@PVDF, (b) NTO@CMC and (c) NTO@CR electrode after 10 cycles.
